# Supplementary material
Source: Springer Nature journal article supplement (https://www.springermedizin.de/resource/supplementary/12990_2009_228_MOESM2_ESM.pdf/9612838)

A.

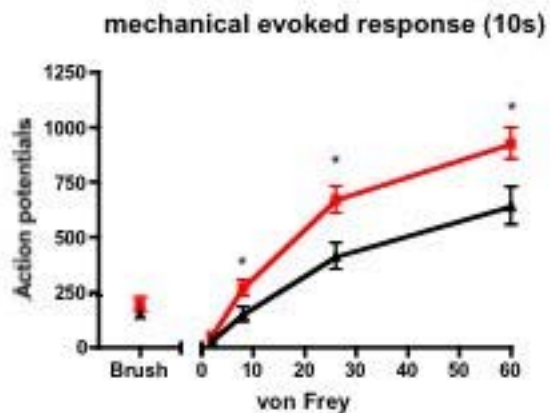

C.

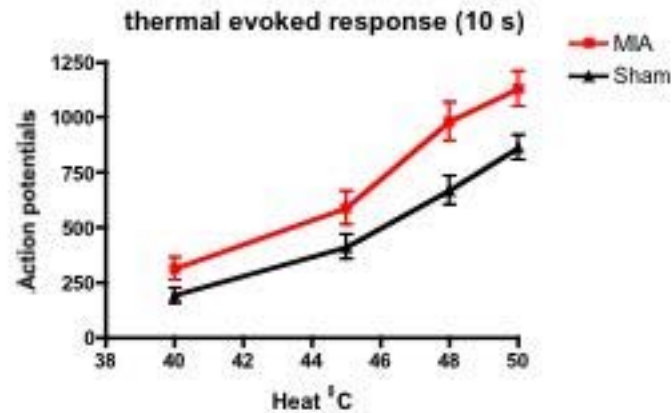

B.

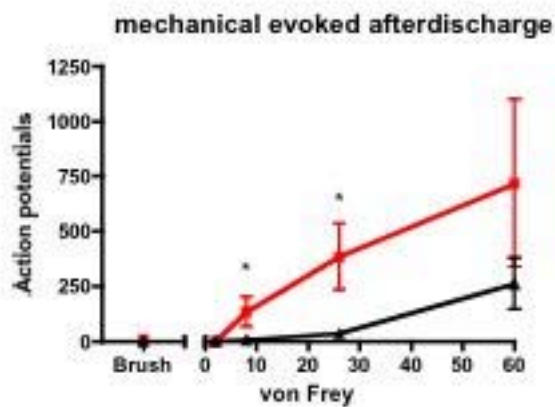

D.

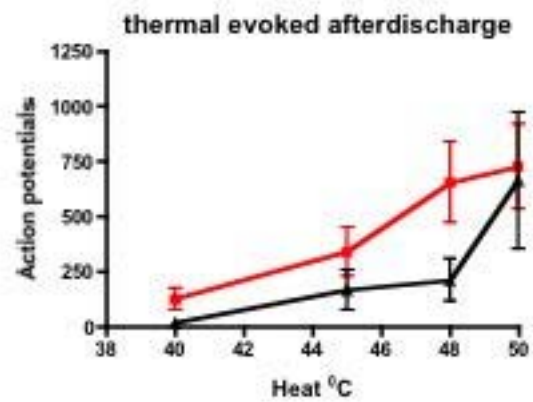

Supplement: MOESM2 [file 9612838]
